# Supplementary material
Source: Royal Society of Chemistry journal article supplement (doi:10.1039/d6cp00477f)
Supplement: d6cp00477f1.pdf [file d6cp00477f1.pdf]

## Supporting Information

### Two-dimensional superatomic B<sub>6</sub>O<sub>2</sub> monolayer for photocatalytic water splitting

Changcheng Wu<sup>1</sup>, Qinqin Yuan<sup>1\*</sup>, Dan Li<sup>1</sup>, and Longjiu Cheng<sup>1,2\*</sup>

<sup>1</sup>*Department of Chemistry, Anhui University, Hefei, 230601, P. R. China.*

<sup>2</sup>*Key Laboratory of Structure and Functional Regulation of Hybrid Materials (Anhui University),  
Ministry of Education, Hefei, 230601, P. R. China.*

\*Corresponding authors. Email: qinqinyuan@ahu.edu.cn, clj@ustc.edu

### Contents

- P2 (Fig. S1)** Electronic band structure and PDOS of B<sub>6</sub>O<sub>2</sub> monolayers by PBE.
- P3 (Fig. S2)** AIMD simulations of the B<sub>6</sub>O<sub>2</sub> monolayer at 500、1000、1500 and 2000K.
- P4 (Fig. S3)** Cleavage energy of B<sub>6</sub>O<sub>2</sub> calculated by exfoliating the top layer from the five-layer slab.
- P5 (Fig. S4)** The charge distributions of the B<sub>6</sub>O<sub>2</sub> monolayer relative to the CBM and VBM are represented by red and blue, respectively.
- P6 (Fig. S5)** The initial and optimized structures of three possible active sites on B<sub>6</sub>O<sub>2</sub> monolayer for (a) \*OH and (b) \*H, respectively. B-site, O-site and B<sub>3</sub>-site denote that \*OH/\*H is absorbed above the B atom, above the O atom, and above the center of the B<sub>3</sub>.
- P7 (Table S1)** Optimized cell parameters and bond lengths (Å) of B<sub>6</sub>O<sub>2</sub> monolayer at different biaxial strain values.
- P8 (Table S2)** Total energy ( $E$ ), zero-point energy correction ( $\Delta E_{\text{zpe}}$ ), entropy contribution (TS,  $T = 298.15$  K) and Gibbs free energy ( $G$ ) of related species for water splitting on the B<sub>6</sub>O<sub>2</sub> monolayer.
- P9 (Table S3)** Structural information of the predicted B<sub>6</sub>O<sub>2</sub> monolayer.
- P10-11** Calculation details of the related oxidation and reduction potential, and the free energy difference ( $\Delta G$ ) for Photocatalytic Water Splitting on the B<sub>6</sub>O<sub>2</sub> monolayer.
- P12** Calculation details about carrier mobilities at 300 K.

## P13 References

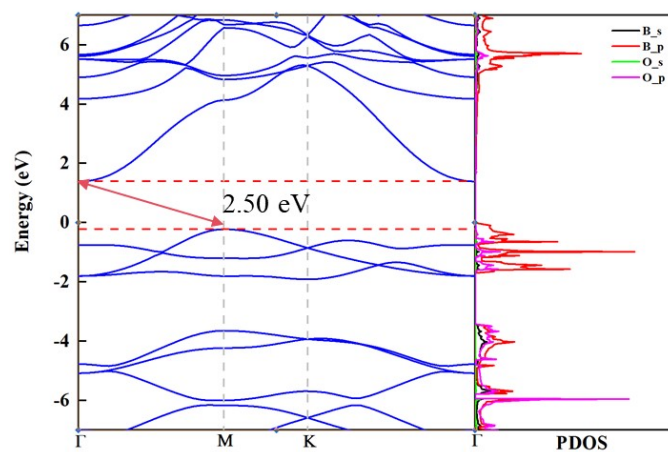

**Fig. S1** Electronic band structure and PDOS of B<sub>6</sub>O<sub>2</sub> monolayers by PBE.

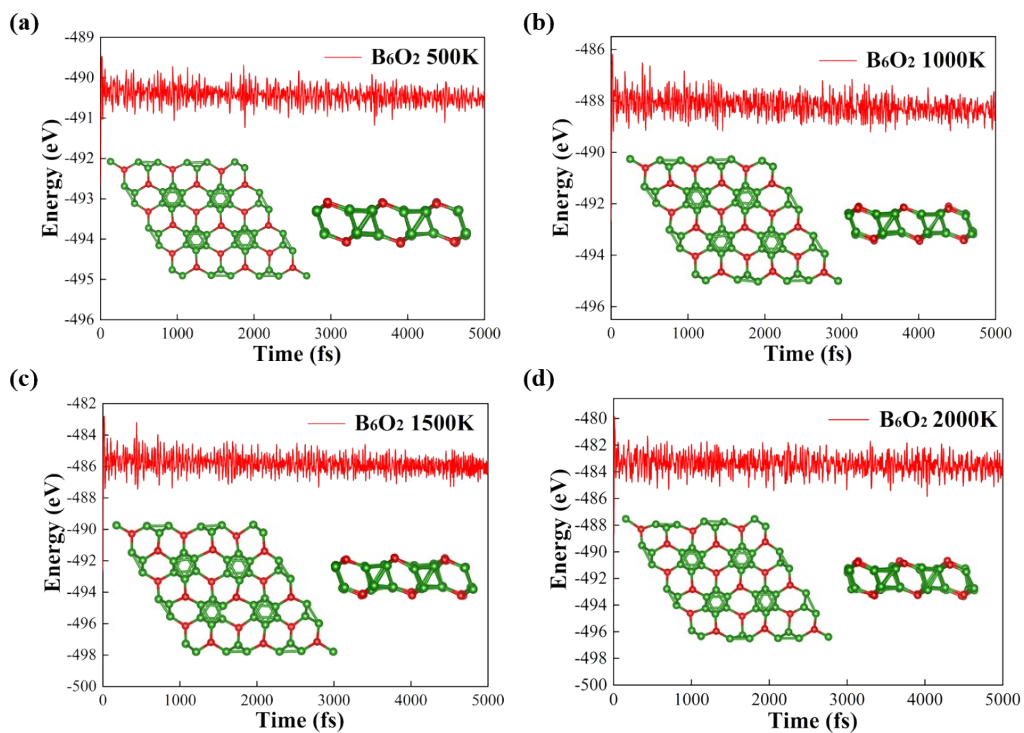

**Fig. S2** AIMD simulation of  $B_6O_2$  monolayer at (a) 500 K (b) 1000 K (c) 1500 K (d) 2000 K showing energy fluctuation with time step and its snapshot image (top and side views).

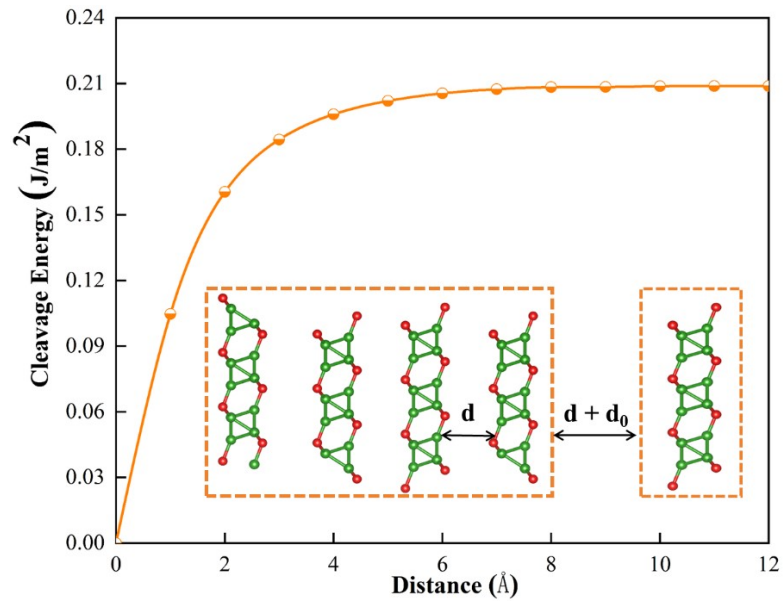

**Fig. S3** Cleavage energy of  $B_6O_2$  calculated by exfoliating the top layer from the five-layer slab.

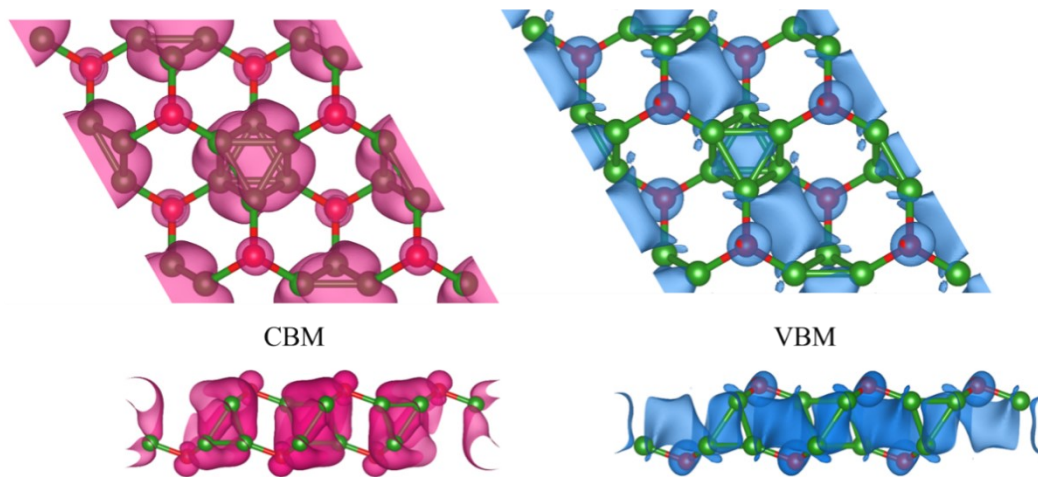

**Fig. S4** The charge distributions of the  $B_6O_2$  monolayer relative to the conduction band minimum (CBM) and valence band minimum (VBM) are represented by red and blue, respectively. The value of the isosurface is set to  $0.007 e/\text{\AA}^3$ .

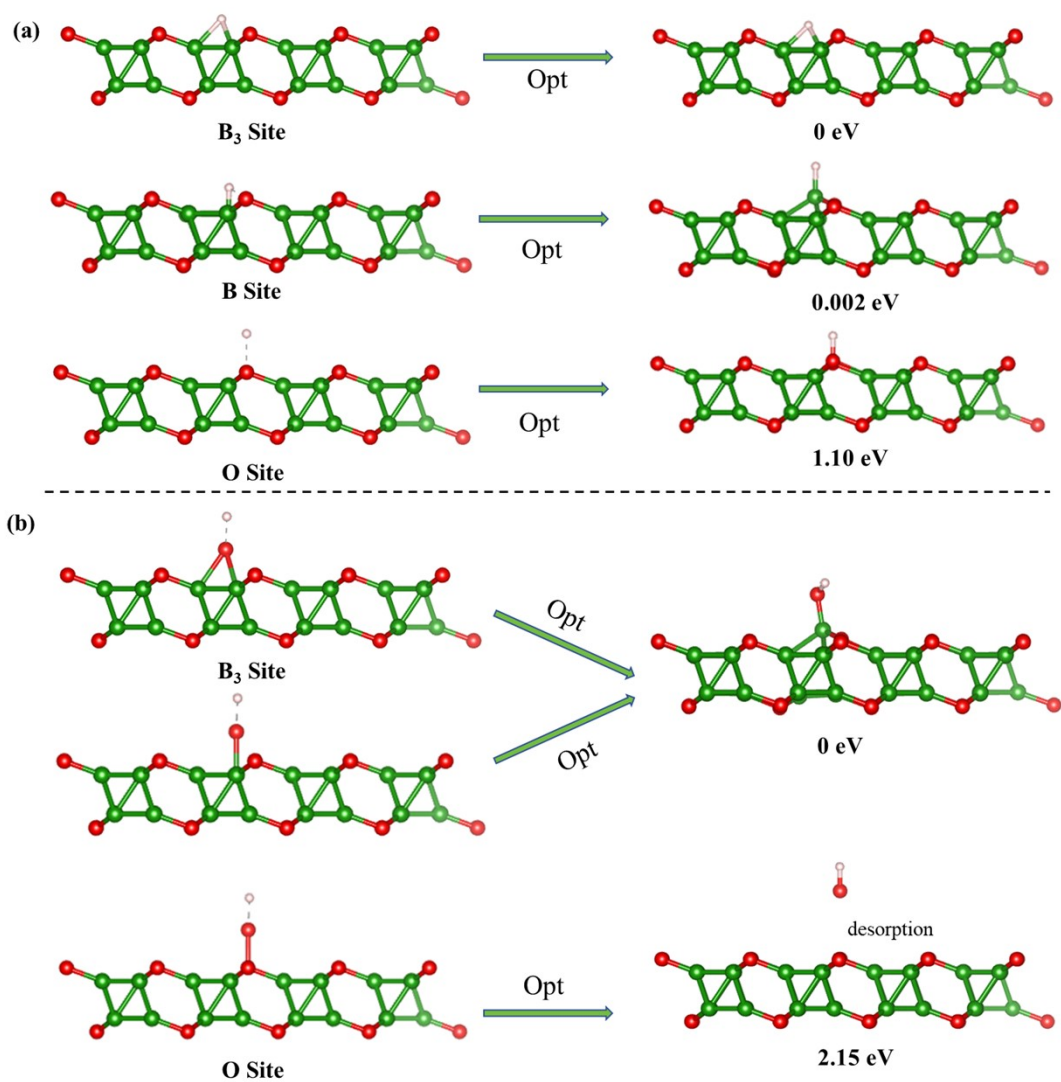

**Fig. S5** The initial and optimized structures of three possible active sites on  $B_6O_2$  monolayer for (a)  $*OH$  and (b)  $*H$ , respectively. B-site, O-site and  $B_3$ -site denote that  $*OH/*H$  is absorbed above the B atom, above the O atom, and above the center of the  $B_3$ . The relative energy (RE, in eV) is listed under the optimized structure.

**TABLE S1** Optimized cell parameters and bond lengths (Å) of B<sub>6</sub>O<sub>2</sub> monolayer at different biaxial strain values.

| Strain | a (Å) | b (Å) | Bond lengths (Å) |      |
|--------|-------|-------|------------------|------|
|        |       |       | B-B              | B-O  |
| +5%    | 4.32  | 4.32  | 1.76             | 1.54 |
| +2%    | 4.20  | 4.2   | 1.76             | 1.51 |
| 0      | 4.12  | 4.12  | 1.75             | 1.49 |
| -2%    | 4.03  | 4.03  | 1.75             | 1.48 |
| -5%    | 3.91  | 3.91  | 1.74             | 1.46 |

**TABLE S2:** Total energy ( $E$ ), zero-point energy correction ( $\Delta E_{\text{zpe}}$ ), entropy contribution (TS,  $T = 298.15$  K) and Gibbs free energy ( $G$ ) of related species for water splitting on the  $\text{B}_6\text{O}_2$  monolayer. All values are in eV.

| Species              | $E$     | $E_{\text{zpe}}$ | TS    | $G$     |
|----------------------|---------|------------------|-------|---------|
| $\text{H}_2$         | -6.76   | 0.27             | 0.400 | -6.89   |
| $\text{H}_2\text{O}$ | -14.22  | 0.57             | 0.670 | -14.32  |
| $\text{OH}^*$        | -509.20 | 0.39             | 0.072 | -508.88 |
| $\text{O}^*$         | -504.76 | 0.30             | 0.147 | -504.61 |
| $\text{OOH}^*$       | -513.26 | 0.46             | 0.181 | -512.98 |
| $\text{H}^*$         | -501.02 | 0.21             | 0.004 | -500.81 |

**TABLE S3:** Structural information of the predicted B<sub>6</sub>O<sub>2</sub> monolayer.

| Space Group | Lattice Parameters<br>(Å , °) | Atoms | Fractional Coordinates |          |          |
|-------------|-------------------------------|-------|------------------------|----------|----------|
|             |                               |       | x                      | y        | z        |
| Pm1         | $a = 4.11505$                 | B1    | 0.48758                | 0.84452  | 9.27100  |
|             | $b = 4.11505$                 | B2    | 2.58857                | 2.05753  | 9.27100  |
|             | $c = 20.0000$                 | B3    | 0.48758                | 3.27053  | 9.27100  |
|             | $\alpha = 90.0000$            | B4    | 0.97517                | 0.00000  | 10.72900 |
|             | $\beta = 90.0000$             | B5    | 3.07616                | -1.21300 | 10.72900 |
|             | $\gamma = 120.0000$           | B6    | 3.07616                | 1.21300  | 10.72900 |
|             |                               | O1    | 2.37582                | 0.00000  | 11.24182 |
|             |                               | O2    | 1.18791                | 2.05752  | 8.75818  |

### 1: Calculation the oxidation and reduction potential ( $E^{\text{oxd}}_{\text{O}_2/\text{H}_2\text{O}}$ and $E^{\text{red}}_{\text{H}^+/\text{H}_2}$ ) for Photocatalytic Water Splitting

Standard redox potential exhibits a strong dependence on ambient pH, and this thermodynamic correlation can be mathematically described by the following equation<sup>1</sup>:

$$E^{\text{oxd}}_{\text{O}_2/\text{H}_2\text{O}} = -5.67 + \text{pH} \times 0.059 \text{ (eV)} \quad (1)$$

$$E^{\text{red}}_{\text{H}^+/\text{H}_2} = -4.44 + \text{pH} \times 0.059 \text{ (eV)} \quad (2)$$

When  $\text{pH} = 7$ , the oxidation potential of water is  $-5.26 \text{ eV}$  and the reduction potential is  $-4.03 \text{ eV}$ .

### 2: Calculation photogenerated electrons for hydrogen reduction reaction ( $U_e$ )/holes for water oxidation ( $U_h$ )

Based on previous studies<sup>2-3</sup>:

$$U_h = \text{VBM} - 4.03 \text{ (eV)} \quad (3)$$

$$U_e = 4.03 - \text{CBM} \text{ (eV)} \quad (4)$$

### 3: Calculation details of the free energy difference ( $\Delta G$ ) for Photocatalytic Water Splitting on the $\text{B}_6\text{O}_2$ monolayer.

For the OER and HER processes, their free energy differences ( $\Delta G$ ) were evaluated according to the approach put forward by Norskov et al.<sup>4</sup>, and the relevant formula is defined as follows:

$$\Delta G = \Delta E + \Delta E_{zpe} - T\Delta S + \Delta G_{\text{pH}} + \Delta G_U$$

where  $\Delta E$  is the adsorption energy,  $\Delta E_{zpe}$  and  $\Delta S$  are the difference in the zero-point energy and entropy between the adsorbed state and the gas phase, respectively.  $\Delta G_{\text{pH}}$  ( $\Delta G_{\text{pH}} = k_B T \times \ln_{10} \times \text{pH}$ ) represents the free energy contributed in different pH concentrations. Here  $T=298.15\text{K}$ .  $\Delta G_U$  ( $\Delta G_U = -eU$ ) denotes the extra potential bias provided by an electron in the electrode, where  $U$  is the electrode potential relative to the standard hydrogen electrode (SHE).

The OER take places via the following four steps:

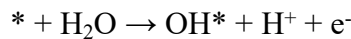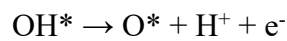

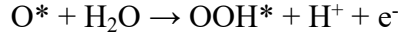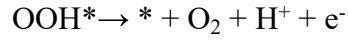

Meanwhile, HER can be decomposed into two steps, the reaction equation can be written as:

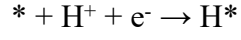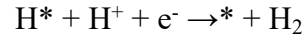

where \* means the adsorbed materials, O\*, OH\*, OOH\* and H\* represent the adsorbed intermediates.

For each step of both the oxidation and hydrogen reactions, the free energy difference under the effect of pH and an extra potential bias can be written as:

$$\Delta G_1 = G_{\text{OH}^*} + 1/2G_{\text{H}_2} - G^* - G_{\text{H}_2\text{O}} + \Delta G_{\text{U}} - \Delta G_{\text{PH}}$$

$$\Delta G_2 = G_{\text{O}^*} + 1/2G_{\text{H}_2} - G_{\text{OH}^*} + \Delta G_{\text{U}} - \Delta G_{\text{PH}}$$

$$\Delta G_3 = G_{\text{OOH}^*} + 1/2G_{\text{H}_2} - G_{\text{O}^*} - G_{\text{H}_2\text{O}} + \Delta G_{\text{U}} - \Delta G_{\text{PH}}$$

$$\Delta G_4 = G^* + 1/2G_{\text{H}_2} + G_{\text{O}_2} - G_{\text{OOH}^*} + \Delta G_{\text{U}} - \Delta G_{\text{PH}}$$

$$\Delta G_5 = G_{\text{H}^*} - 1/2G_{\text{H}_2} - G^* + \Delta G_{\text{U}} + \Delta G_{\text{PH}}$$

$$\Delta G_6 = G^* + 1/2G_{\text{H}_2} - G_{\text{H}^*} + \Delta G_{\text{U}} + \Delta G_{\text{PH}}$$

**2: Calculation the in-plane stiffness ( $C_{2D}$ ), effective mass ( $m^*$ ), deformation potential constant ( $E_1$ ), and carrier mobilities ( $\mu$ ) at 300 K.**

The carrier mobility ( $\mu$ ) for the two-dimensional  $B_6O_2$  monolayer was evaluated using the deformation potential theory, which is well-established for describing charge transport in 2D semiconductors. The expression for the directional mobility  $\mu$  is given by:

$$\mu = eh^3C_{2D} / k_B T m^* m_d E_1^2$$

- $e$  is the elementary charge.
- $\hbar$  is the reduced Planck constant.
- $k_B$  is the Boltzmann constant.
- $T$  is the temperature (here, 300 K).
- $m^*$  denotes the effective mass along a specific transport direction.
- $m_d$  represents the average (density-of-states) effective mass.
- $C_{2D}$  is the in-plane elastic modulus along the corresponding transport direction.
- $E_1$  is the deformation potential constant, describing the shift of the band edge with respect to strain.

## References:

- 1 X. Lv, W. Wei, Q. Sun, F. Li, B. Huang and Y. Dai, Two-dimensional germanium monochalcogenides for photocatalytic water splitting with high carrier mobility, *Appl. Catal. Environ.*, 2017, **217**, 275-284.
- 2 Qiao, J. Liu, Y. Wang, Y. Li and Z. Chen, PdSeO<sub>3</sub> monolayer: promising inorganic 2D photocatalyst for direct overall water splitting without using sacrificial reagents and cocatalysts, *J. Am. Chem. Soc.*, 2018, **140**, 12256-12262.
- 3 L. Ju, J. Shang, X. Tang and L. Kou, Tunable photocatalytic water splitting by the ferroelectric switch in a 2D AgBiP<sub>2</sub>Se<sub>6</sub> monolayer, *J. Am. Chem. Soc.*, 2020, **142**, 1492-1500.
- 4 J. K. Nørskov, J. Rossmeisl, A. Logadottir, L. Lindqvist, J. R. Kitchin, T. Bligaard and H. Jónsson, Origin of the overpotential for oxygen reduction at a fuel-cell cathode, *J. Phys. Chem. B*, 2004, **108**, 17886-17892.
